# Supplementary figures and images for: Depletion of SMN protein in mesenchymal progenitors impairs the development of bone and neuromuscular junction in spinal muscular atrophy
Source: eLife journal article supplement (doi:10.7554/elife.92731), 2023-11-07

**G**

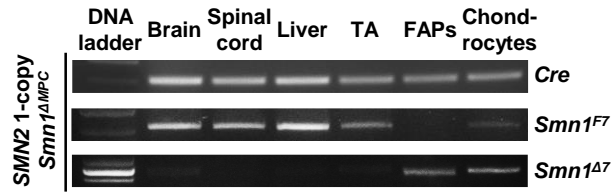

Figure 2G\_Cre

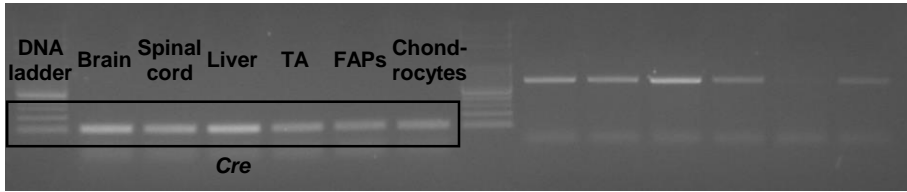

Figure 2G\_Smn1 F7

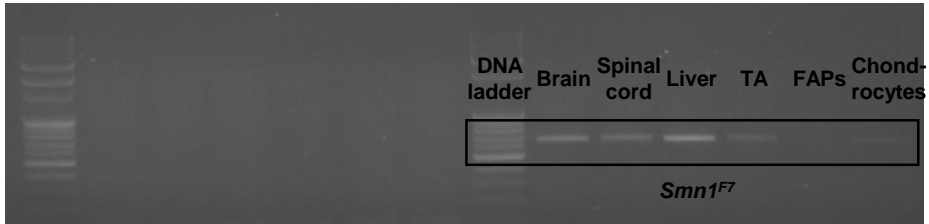

Figure 2G\_Smn1 D7

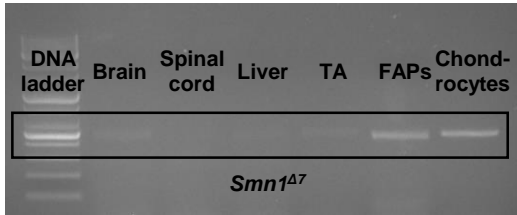

**I**

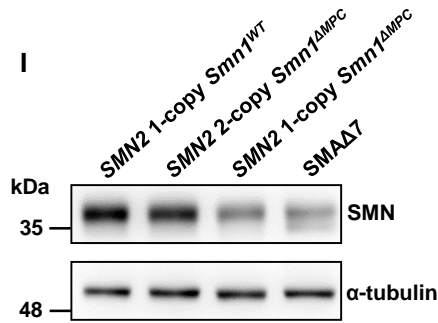

Figure 2I\_anti-alpha-tubulin

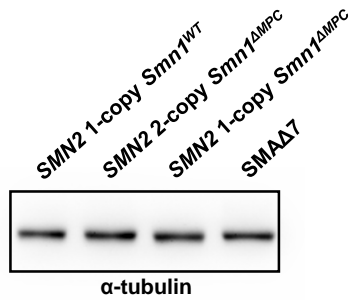

Figure 2I\_anti-SMN

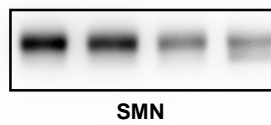

Supplement: fig2-data2 [file elife-92731-fig2-data2-v1.zip]
